# Supplementary material for: The Genome-Wide Identification, Characterization, and Expression Analysis of the Strictosidine Synthase-like Family in Maize (Zea mays L.)
Source: MDPI journal article supplement (doi:10.3390/ijms241914733), 2023-09-29
Supplement: s1 [file s1]

**Supplementary Table S2.** Characteristics of *SSL* genes in sorghum, *Ae. tauschii*, rice, and Arabidopsis.

| Gene NCBI ID               | Gene name       | CDS (bp) | Protein Size (aa) | MW (kDa) | pI   | Subcellular Location    |
|----------------------------|-----------------|----------|-------------------|----------|------|-------------------------|
| <b>Sorghum</b>             |                 |          |                   |          |      |                         |
| XM_002463826.2             | <i>SbSSL1</i>   | 1197     | 398               | 44.27    | 6.34 | Plasma membrane         |
| XM_002467521.2             | <i>SbSSL2</i>   | 1101     | 366               | 39.96    | 5.92 | Extracellular/Cell wall |
| XM_002467825.2             | <i>SbSSL3</i>   | 1026     | 341               | 36.69    | 6.53 | Chloroplast/Thylakoid   |
| XM_021450900.1             | <i>SbSSL4</i>   | 1272     | 423               | 48.07    | 8.51 | Endoplasmic reticulum   |
| XM_002460105.2             | <i>SbSSL5</i>   | 1053     | 350               | 37.06    | 6.98 | Chloroplast/Thylakoid   |
| XM_002460106.2             | <i>SbSSL6</i>   | 1101     | 366               | 39.38    | 8.99 | Mitochondrion           |
| XM_021454025.1             | <i>SbSSL7</i>   | 1083     | 360               | 38.76    | 5.16 | Chloroplast/Thylakoid   |
| XM_021454024.1             | <i>SbSSL8</i>   | 1107     | 368               | 39.75    | 5.18 | Extracellular/Cell wall |
| XM_002456214.2             | <i>SbSSL9</i>   | 1044     | 347               | 36.86    | 8.63 | Chloroplast/Thylakoid   |
| XM_002456598.2             | <i>SbSSL10</i>  | 1038     | 345               | 36.84    | 5.80 | Chloroplast/Thylakoid   |
| XM_002456676.2             | <i>SbSSL11</i>  | 1044     | 347               | 36.75    | 5.89 | Chloroplast/Thylakoid   |
| XM_002452406.2             | <i>SbSSL12</i>  | 1035     | 344               | 36.67    | 9.03 | Vacular membrane        |
| XM_002452874.1             | <i>SbSSL13</i>  | 1041     | 346               | 37.27    | 9.12 | Vacular membrane        |
| XM_002452931.2             | <i>SbSSL14</i>  | 1041     | 346               | 37.34    | 9.02 | Vacular membrane        |
| XM_002450198.2             | <i>SbSSL15</i>  | 1173     | 390               | 43.04    | 5.97 | Endoplasmic reticulum   |
| XM_002448917.2             | <i>SbSSL16</i>  | 1179     | 392               | 43.03    | 6.28 | Endoplasmic reticulum   |
| XM_002443544.2             | <i>SbSSL17</i>  | 1032     | 343               | 37.99    | 6.00 | Chloroplast/Thylakoid   |
| XM_021466141.1             | <i>SbSSL18</i>  | 984      | 327               | 35.56    | 8.78 | Chloroplast/Thylakoid   |
| XM_002440687.2             | <i>SbSSL19</i>  | 570      | 189               | 19.94    | 7.09 | Chloroplast/Thylakoid   |
| XM_002438595.2             | <i>SbSSL20</i>  | 1164     | 387               | 40.41    | 8.31 | Endoplasmic reticulum   |
| XM_002438796.1             | <i>SbSSL21</i>  | 1041     | 346               | 37.25    | 9.12 | Vacular membrane        |
| <b><i>Ae. tauschii</i></b> |                 |          |                   |          |      |                         |
| XM_020328930.3             | <i>AetSSL1</i>  | 1104     | 367               | 39.28    | 5.05 | Extracellular/Cell wall |
| XM_020311481.1             | <i>AetSSL2</i>  | 1032     | 343               | 36.57    | 6.40 | Mitochondrion           |
| XM_020311479.3             | <i>AetSSL3</i>  | 1155     | 384               | 41.58    | 5.75 | Cytosol                 |
| XM_020311480.3             | <i>AetSSL4</i>  | 1032     | 343               | 36.90    | 7.09 | Extracellular/Cell wall |
| XM_020332098.1             | <i>AetSSL5</i>  | 942      | 313               | 34.32    | 5.98 | Vacular membrane        |
| XM_020345579.3             | <i>AetSSL6</i>  | 1104     | 367               | 38.97    | 4.97 | Endoplasmic reticulum   |
| XM_020331117.3             | <i>AetSSL7</i>  | 1098     | 365               | 38.98    | 5.72 | Endoplasmic reticulum   |
| XM_020321132.3             | <i>AetSSL8</i>  | 1074     | 357               | 38.61    | 6.55 | Chloroplast/Thylakoid   |
| XM_020321538.2             | <i>AetSSL9</i>  | 1170     | 389               | 42.55    | 8.85 | Cytosol                 |
| XM_045233917.1             | <i>AetSSL10</i> | 1170     | 389               | 42.53    | 8.90 | Cytosol                 |
| XM_020322447.3             | <i>AetSSL11</i> | 1242     | 413               | 46.71    | 7.18 | Endoplasmic reticulum   |
| XM_020317747.3             | <i>AetSSL12</i> | 1125     | 374               | 40.87    | 6.28 | Chloroplast/Thylakoid   |
| XM_020312210.3             | <i>AetSSL13</i> | 1041     | 346               | 37.20    | 7.76 | Chloroplast/Thylakoid   |
| XM_020312214.3             | <i>AetSSL14</i> | 1095     | 364               | 39.48    | 8.19 | Chloroplast/Thylakoid   |
| XM_020324203.2             | <i>AetSSL15</i> | 1014     | 337               | 36.33    | 6.91 | Chloroplast/Thylakoid   |
| XM_020293478.3             | <i>AetSSL16</i> | 1197     | 398               | 43.64    | 5.91 | Extracellular/Cell wall |
| XM_040394268.2             | <i>AetSSL17</i> | 1035     | 344               | 37.84    | 8.69 | Vacular membrane        |
| XM_020331968.3             | <i>AetSSL18</i> | 1086     | 361               | 39.52    | 7.71 | Chloroplast/Thylakoid   |

|                    |                 |      |     |       |      |                         |
|--------------------|-----------------|------|-----|-------|------|-------------------------|
| XM_020326298.1     | <i>AetSSL19</i> | 501  | 166 | 18.62 | 9.35 | Cytosol                 |
| XM_020326303.1     | <i>AetSSL20</i> | 1038 | 345 | 37.67 | 8.24 | Vacular membrane        |
| XM_020291800.2     | <i>AetSSL21</i> | 1047 | 348 | 37.72 | 8.90 | Chloroplast/Thylakoid   |
| XM_020308049.1     | <i>AetSSL22</i> | 1047 | 348 | 37.77 | 9.30 | Chloroplast/Thylakoid   |
| XM_020304825.3     | <i>AetSSL23</i> | 1038 | 345 | 37.48 | 8.98 | Chloroplast/Thylakoid   |
| XM_020327805.3     | <i>AetSSL24</i> | 1050 | 349 | 37.85 | 9.16 | Chloroplast/Thylakoid   |
| XM_040397558.1     | <i>AetSSL25</i> | 675  | 225 | 24.51 | 5.96 | Partial sequence        |
| XM_020335935.2     | <i>AetSSL26</i> | 747  | 248 | 27.06 | 6.81 | Cytosol                 |
| XM_040397573.1     | <i>AetSSL27</i> | 825  | 274 | 29.75 | 6.82 | Chloroplast/Thylakoid   |
| XM_040397578.1     | <i>AetSSL28</i> | 789  | 262 | 28.40 | 8.67 | Vacular membrane        |
| XM_040397587.1     | <i>AetSSL29</i> | 840  | 280 | 31.05 | 8.99 | Partial sequence        |
| XM_020292326.2     | <i>AetSSL30</i> | 390  | 129 | 14.32 | 9.89 | Cytosol                 |
| XM_040397643.1     | <i>AetSSL31</i> | 912  | 304 | 33.52 | 7.23 | Partial sequence        |
| XM_045232141.1     | <i>AetSSL32</i> | 1170 | 389 | 42.55 | 9.04 | Cytosol                 |
| XM_020292328.1     | <i>AetSSL33</i> | 1038 | 345 | 37.71 | 9.37 | Vacular membrane        |
| <b>Rice</b>        |                 |      |     |       |      |                         |
| XM_015774752.2     | <i>OsSSL1</i>   | 1284 | 427 | 47.80 | 6.25 | Cytosol                 |
| XM_015777851.1     | <i>OsSSL2</i>   | 1443 | 480 | 53.71 | 8.75 | Cytosol                 |
| XM_015786906.2     | <i>OsSSL3</i>   | 1038 | 345 | 37.55 | 9.57 | Chloroplast/Thylakoid   |
| XM_015786907.2     | <i>OsSSL4</i>   | 1044 | 347 | 37.62 | 9.47 | Chloroplast/Thylakoid   |
| XM_015790531.2     | <i>OsSSL5</i>   | 1053 | 350 | 37.42 | 8.80 | Cytosol                 |
| XM_026027054.1     | <i>OsSSL6</i>   | 747  | 248 | 26.98 | 9.15 | Cytosol                 |
| XM_015790533.1     | <i>OsSSL7</i>   | 1080 | 359 | 38.68 | 9.05 | Cytosol                 |
| XM_015789067.2     | <i>OsSSL8</i>   | 1104 | 367 | 39.66 | 4.91 | Chloroplast/Thylakoid   |
| XM_015793705.2     | <i>OsSSL9</i>   | 1071 | 356 | 38.06 | 6.15 | Mitochondrion           |
| XM_015794103.2     | <i>OsSSL10</i>  | 1053 | 350 | 38.04 | 8.13 | Extracellular/Cell wall |
| XM_015755842.2     | <i>OsSSL11</i>  | 1095 | 364 | 38.19 | 8.53 | Extracellular/Cell wall |
| XM_015755680.2     | <i>OsSSL12</i>  | 1101 | 366 | 38.51 | 6.56 | Chloroplast/Thylakoid   |
| XM_015755936.2     | <i>OsSSL13</i>  | 1149 | 382 | 40.01 | 9.16 | Cytosol                 |
| XM_015757236.2     | <i>OsSSL14</i>  | 1110 | 369 | 39.51 | 5.25 | Extracellular/Cell wall |
| XM_015761176.2     | <i>OsSSL15</i>  | 1116 | 371 | 41.19 | 8.80 | Cytosol                 |
| XM_015764132.2     | <i>OsSSL16</i>  | 2013 | 670 | 73.69 | 9.44 | Plasma membrane         |
| <b>Arabidopsis</b> |                 |      |     |       |      |                         |
| NM_129694.5        | <i>AtSSL1</i>   | 1185 | 394 | 44.39 | 6.21 | Endoplasmic reticulum   |
| NM_129693.4        | <i>AtSSL2</i>   | 1131 | 376 | 41.48 | 6.20 | Extracellular/Cell wall |
| NM_100720.3        | <i>AtSSL3</i>   | 1173 | 390 | 44.04 | 8.11 | Cytosol                 |
| NM_115001.3        | <i>AtSSL4</i>   | 1113 | 370 | 41.60 | 5.65 | Chloroplast/Thylakoid   |
| NM_115002.4        | <i>AtSSL5</i>   | 1116 | 371 | 41.64 | 6.20 | Chloroplast/Thylakoid   |
| NM_115003.3        | <i>AtSSL6</i>   | 1116 | 371 | 41.38 | 5.83 | Chloroplast/Thylakoid   |
| NM_115004.5        | <i>AtSSL7</i>   | 1116 | 371 | 41.12 | 5.40 | Chloroplast/Thylakoid   |
| NM_115560.4        | <i>AtSSL8</i>   | 1131 | 376 | 41.98 | 5.78 | Extracellular/Cell wall |
| NM_115561.5        | <i>AtSSL9</i>   | 1113 | 370 | 41.46 | 6.56 | Vacular membrane        |
| NM_115562.4        | <i>AtSSL10</i>  | 1125 | 374 | 41.00 | 7.71 | Extracellular/Cell wall |
| NM_106059.5        | <i>AtSSL11</i>  | 990  | 329 | 34.67 | 9.66 | Chloroplast/Thylakoid   |

|             |                |      |     |       |      |                         |
|-------------|----------------|------|-----|-------|------|-------------------------|
| NM_106061.4 | <i>AtSSL12</i> | 1008 | 335 | 35.29 | 5.60 | Extracellular/Cell wall |
| NM_202733.3 | <i>AtSSL13</i> | 1212 | 403 | 45.63 | 6.41 | Cytosol                 |
| NM_147884.6 | <i>AtSSL14</i> | 978  | 325 | 34.18 | 8.27 | Extracellular/Cell wall |
| NM_106060.3 | <i>AtSSL15</i> | 1188 | 395 | 44.53 | 6.52 | Extracellular/Cell wall |
