# Supplementary material for: The Genome-Wide Identification, Characterization, and Expression Analysis of the Strictosidine Synthase-like Family in Maize (Zea mays L.)
Source: MDPI journal article supplement (doi:10.3390/ijms241914733), 2023-09-29
Supplement: s1 [file s1]

**Supplementary Table S1.** Chromosome location of *SSL* genes in maize, sorghum, *A. tauschii*, rice.

| Gene NCBI ID   | Gene name      | Chromosome location |           |
|----------------|----------------|---------------------|-----------|
| XM_008657285.2 | <i>ZmSSL1</i>  | chr1 57765926       | 57767063  |
| XM_008657302.2 | <i>ZmSSL2</i>  | chr1 57839451       | 57840473  |
| XM_008657311.2 | <i>ZmSSL3</i>  | chr1 57931853       | 57933018  |
| NM_001156536.2 | <i>ZmSSL4</i>  | chr1 283339547      | 283343836 |
| NM_001148541.1 | <i>ZmSSL5</i>  | chr2 217816869      | 217819033 |
| XM_008673664.2 | <i>ZmSSL6</i>  | chr2 230318018      | 230319097 |
| NM_001139223.1 | <i>ZmSSL7</i>  | chr4 192686880      | 192690390 |
| NM_001157297.1 | <i>ZmSSL8</i>  | chr7 106494786      | 106497772 |
| XM_008654423.3 | <i>ZmSSL9</i>  | chr7 106530695      | 106547501 |
| XM_008658790.4 | <i>ZmSSL10</i> | chr8 172251596      | 172253051 |
| NM_001157473.1 | <i>ZmSSL11</i> | chr8 172317613      | 172318880 |
| XM_008659695.3 | <i>ZmSSL12</i> | chr8 174314286      | 174315473 |
| XM_008658833.3 | <i>ZmSSL13</i> | chr8 174331242      | 174332515 |
| XM_008658834.2 | <i>ZmSSL14</i> | chr8 174358455      | 174359659 |
| XM_008658837.2 | <i>ZmSSL15</i> | chr8 174395363      | 174396627 |
| XM_008658836.3 | <i>ZmSSL16</i> | chr8 174410231      | 174411557 |
| XM_020542371.1 | <i>ZmSSL17</i> | chr8 174430134      | 174431217 |
| XM_008658839.2 | <i>ZmSSL18</i> | chr8 174482109      | 174483408 |
| XM_008658840.2 | <i>ZmSSL19</i> | chr8 174500075      | 174501305 |
| NM_001324231.1 | <i>ZmSSL20</i> | chr9 147078558      | 147080384 |
|                |                |                     |           |
| XM_002463826.2 | <i>SbSSL1</i>  | chr1 6859543        | 6862526   |
| XM_002467521.2 | <i>SbSSL2</i>  | chr1 59691570       | 59693299  |
| XM_002467825.2 | <i>SbSSL3</i>  | chr1 66394286       | 66395456  |
| XM_021450900.1 | <i>SbSSL4</i>  | chr1 70741147       | 70742951  |
| XM_002460105.2 | <i>SbSSL5</i>  | chr2 57083619       | 57085977  |
| XM_002460106.2 | <i>SbSSL6</i>  | chr2 57098251       | 57108121  |
| XM_021454025.1 | <i>SbSSL7</i>  | chr2 73117634       | 73119617  |
| XM_021454024.1 | <i>SbSSL8</i>  | chr2 73138055       | 73140079  |
| XM_002456214.2 | <i>SbSSL9</i>  | chr3 61486680       | 61487971  |
| XM_002456598.2 | <i>SbSSL10</i> | chr3 67591011       | 67592753  |
| XM_002456676.2 | <i>SbSSL11</i> | chr3 68860446       | 68861672  |
| XM_002452406.2 | <i>SbSSL12</i> | chr4 56536269       | 56537510  |
| XM_002452874.1 | <i>SbSSL13</i> | chr4 65410858       | 65411898  |
| XM_002452931.2 | <i>SbSSL14</i> | chr4 66353384       | 66354807  |
| XM_002450198.2 | <i>SbSSL15</i> | chr5 2609045        | 2613027   |
| XM_002448917.2 | <i>SbSSL16</i> | chr5 2668432        | 2672828   |
| XM_002443544.2 | <i>SbSSL17</i> | chr8 61143309       | 61144998  |
| XM_021466141.1 | <i>SbSSL18</i> | chr8 61167632       | 61177583  |
| XM_002440687.2 | <i>SbSSL19</i> | chr9 7859462        | 7860031   |
| XM_002438595.2 | <i>SbSSL20</i> | chr10 52416523      | 52418163  |

|                |                 |                |             |
|----------------|-----------------|----------------|-------------|
| XM_002438796.1 | <i>SbSSL21</i>  | chr10 56908806 | 56909846    |
| XM_020328930.3 | <i>AetSSL1</i>  | chr1 299082938 | 299085192   |
| XM_020311481.1 | <i>AetSSL2</i>  | chr2 33638849  | 33639978    |
| XM_020311479.3 | <i>AetSSL3</i>  | chr2 33676626  | 33678709    |
| XM_020311480.3 | <i>AetSSL4</i>  | chr2 33680203  | 33681635    |
| XM_020332098.1 | <i>AetSSL5</i>  | chr2 71431862  | 71432803    |
| XM_020345579.3 | <i>AetSSL6</i>  | chr2 122004608 | 122006651   |
| XM_020331117.3 | <i>AetSSL7</i>  | chr2 122299282 | 122301235   |
| XM_020321132.3 | <i>AetSSL8</i>  | chr3 367134471 | 367135904   |
| XM_020321538.2 | <i>AetSSL9</i>  | chr3 603545210 | 603546491   |
| XM_045233917.1 | <i>AetSSL10</i> | chr3 604261675 | 604263216   |
| XM_020322447.3 | <i>AetSSL11</i> | chr4 377349425 | 377351945   |
| XM_020317747.3 | <i>AetSSL12</i> | chr5 229164106 | 229167108   |
| XM_020312210.3 | <i>AetSSL13</i> | chr5 314403773 | 314405607   |
| XM_020312214.3 | <i>AetSSL14</i> | chr5 314642224 | 314645598   |
| XM_020324203.2 | <i>AetSSL15</i> | chr5 465855619 | 465857107   |
| XM_020293478.3 | <i>AetSSL16</i> | chr5 473098767 | 473101358   |
| XM_040394268.2 | <i>AetSSL17</i> | chr7 43894988  | 43896165    |
| XM_020331968.3 | <i>AetSSL18</i> | chr7 43960967  | 43963227    |
| XM_020326298.1 | <i>AetSSL19</i> | chr7 44048675  | 44049175    |
| XM_020326303.1 | <i>AetSSL20</i> | chr7 44058399  | 44059436    |
| XM_020291800.2 | <i>AetSSL21</i> | chr7 90228398  | 90230558    |
| XM_020308049.1 | <i>AetSSL22</i> | chr7 90298207  | 90299253    |
| XM_020304825.3 | <i>AetSSL23</i> | chr7 90508588  | 90510185    |
| XM_020327805.3 | <i>AetSSL24</i> | chr7 90612354  | 90613780    |
| XM_040397558.1 | <i>AetSSL25</i> | NW_025487989.1 | 5 681       |
| XM_020335935.2 | <i>AetSSL26</i> | NW_025495645.1 | 16 762      |
| XM_040397573.1 | <i>AetSSL27</i> | NW_025500911.1 | 7 831       |
| XM_040397578.1 | <i>AetSSL28</i> | NW_025504744.1 | 8 914       |
| XM_040397587.1 | <i>AetSSL29</i> | NW_025507561.1 | 6 921       |
| XM_020292326.2 | <i>AetSSL30</i> | NW_025512283.1 | 660 1049    |
| XM_040397643.1 | <i>AetSSL31</i> | NW_025517689.1 | 5 1356      |
| XM_045232141.1 | <i>AetSSL32</i> | NW_025531641.1 | 8092 12923  |
| XM_020292328.1 | <i>AetSSL33</i> | NW_025533088.1 | 38744 39781 |
| XM_015774752.2 | <i>OsSSL1</i>   | chr3 8664268   | 8666379     |
| XM_015777851.1 | <i>OsSSL2</i>   | chr3 30927228  | 30929818    |
| XM_015786906.2 | <i>OsSSL3</i>   | chr6 25080840  | 25081930    |
| XM_015786907.2 | <i>OsSSL4</i>   | chr6 25085509  | 25094294    |
| XM_015790531.2 | <i>OsSSL5</i>   | chr7 21518901  | 21520060    |
| XM_026027054.1 | <i>OsSSL6</i>   | chr7 21558382  | 21559551    |
| XM_015790533.1 | <i>OsSSL7</i>   | chr7 21564056  | 21573587    |
| XM_015789067.2 | <i>OsSSL8</i>   | chr7 25287500  | 25290041    |

---

|                |                |                |          |
|----------------|----------------|----------------|----------|
| XM_015793705.2 | <i>OsSSL9</i>  | chr8 4370774   | 4372947  |
| XM_015794103.2 | <i>OsSSL10</i> | chr8 21549609  | 21551813 |
| XM_015755842.2 | <i>OsSSL11</i> | chr9 12454357  | 12460991 |
| XM_015755680.2 | <i>OsSSL12</i> | chr9 12466343  | 12484831 |
| XM_015755936.2 | <i>OsSSL13</i> | chr9 12536480  | 12540746 |
| XM_015757236.2 | <i>OsSSL14</i> | chr10 21224291 | 21226900 |
| XM_015761176.2 | <i>OsSSL15</i> | chr11 1986272  | 1988401  |
| XM_015764132.2 | <i>OsSSL16</i> | chr12 1882224  | 1888271  |

---
