# Supplementary material for: The Genome-Wide Identification, Characterization, and Expression Analysis of the Strictosidine Synthase-like Family in Maize (Zea mays L.)
Source: MDPI journal article supplement (doi:10.3390/ijms241914733), 2023-09-29
Supplement: s1 [file s1]

Supplementary Table S6. List of Primers

| Primer name | Primer sequence                                |
|-------------|------------------------------------------------|
| ZmActin1-F  | TACGAGATGCCTGATGGTCAGGTCA                      |
| ZmActin1-R  | TGGAGTTGTACGTGGCCTCATGGAC                      |
| ZmSSL4-RT-F | TCGCAACCTCCAATTTCCC                            |
| ZmSSL4-RT-R | CCTTCTCGCCTTTCAACCAG                           |
| ZmSSL5-RT-F | TTCTGGATTGCCGTCCTCC                            |
| ZmSSL5-RT-R | CCCTTGCTCCACTCGCTGA                            |
| ZmSSL6-RT-F | AGGGTCGGTGACGAGGGAGT                           |
| ZmSSL6-RT-R | GCTGGCGTCGCTGAAGTAGA                           |
| ZmSSL7-RT-F | TCTCCTACCCCTGGCTCCG                            |
| ZmSSL7-RT-R | TCCCGTCCTCCTCGCTCA                             |
| ZmSSL8-RT-F | TTCGCCTACAACCTCCAAGCACA                        |
| ZmSSL8-RT-R | CGTAAAGGTCGCCGGACTGC                           |
| ZmSSL9-RT-F | CCAGCGGAGCGACTACATCA                           |
| ZmSSL9-RT-R | CCGTTGGGGAAGGACAGG                             |
| ZmSSL4-F    | AGAACACGGGGGACTCTAGA ATGGCGTCGCCGGG            |
| ZmSSL4-R    | CTCACCATGGTACCCTCGAG AGACGCCTTCGCGAGGTC        |
| ZmSSL5-F    | AGAACACGGGGGACTCTAGA ATGGCGCCTGGCCTCC          |
| ZmSSL5-R    | CTCACCATGGTACCCTCGAG<br>CGAAGATACTGCTCCCTGCTTC |
